# Supplementary material for: Guest–host interlinked PEG-MAL granular hydrogels as an engineered cellular microenvironment
Source: Royal Society of Chemistry journal article supplement (doi:10.1039/d0bm01499k), 2020-12-28
Supplement: d0bm01499k2.pdf [file d0bm01499k2.pdf]

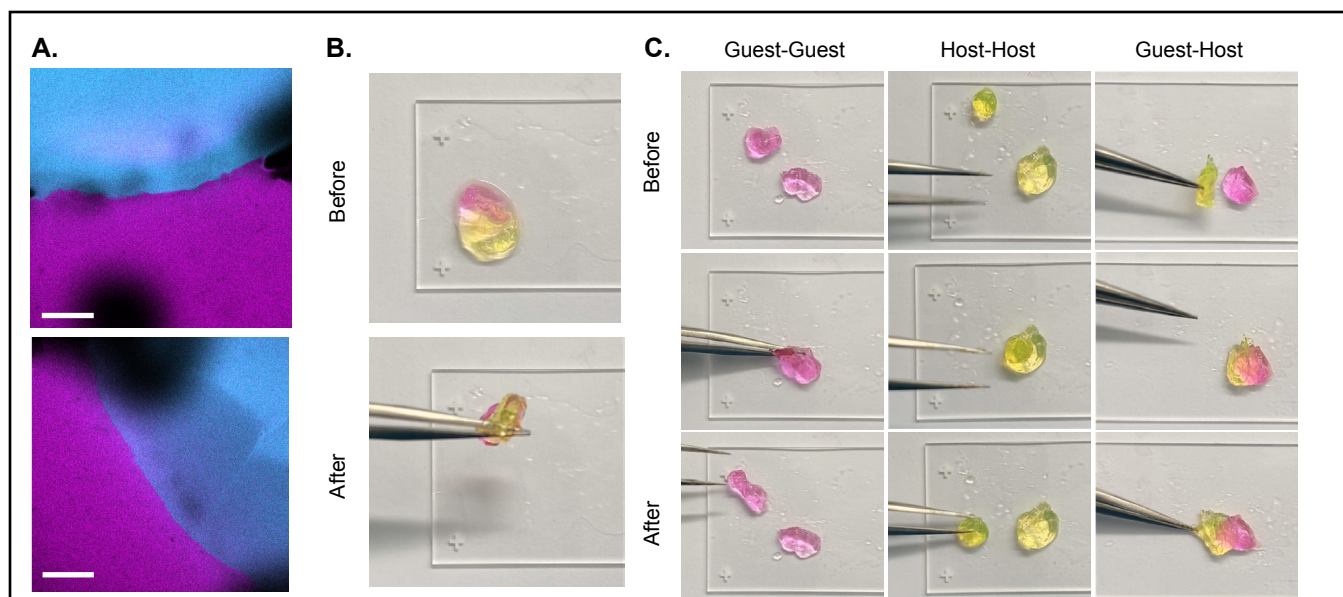

**Supplementary Figure 2:** Bulk gel interactions. (A) Interface between guest (magenta) and host (cyan) bulk gels, the guest-host interactions along the interface are almost inseparable. Scale bar = 200  $\mu\text{m}$ . (B) Stills from bulk-gel interaction video: "Pick-up test". Guest gels (magenta) and host gels (green) interact strongly when in contact (before). If one gel is picked up, the guest-host interaction resists the force of gravity (after). (C) Interactions between bulk gels: guest-guest (magenta), host-host (green), and guest-host. Before interaction, during interaction and after interaction are displayed for each gel combination.
