# Supplementary figures and images for: Guest–host interlinked PEG-MAL granular hydrogels as an engineered cellular microenvironment
Source: Royal Society of Chemistry journal article supplement (doi:10.1039/d0bm01499k), 2020-12-28

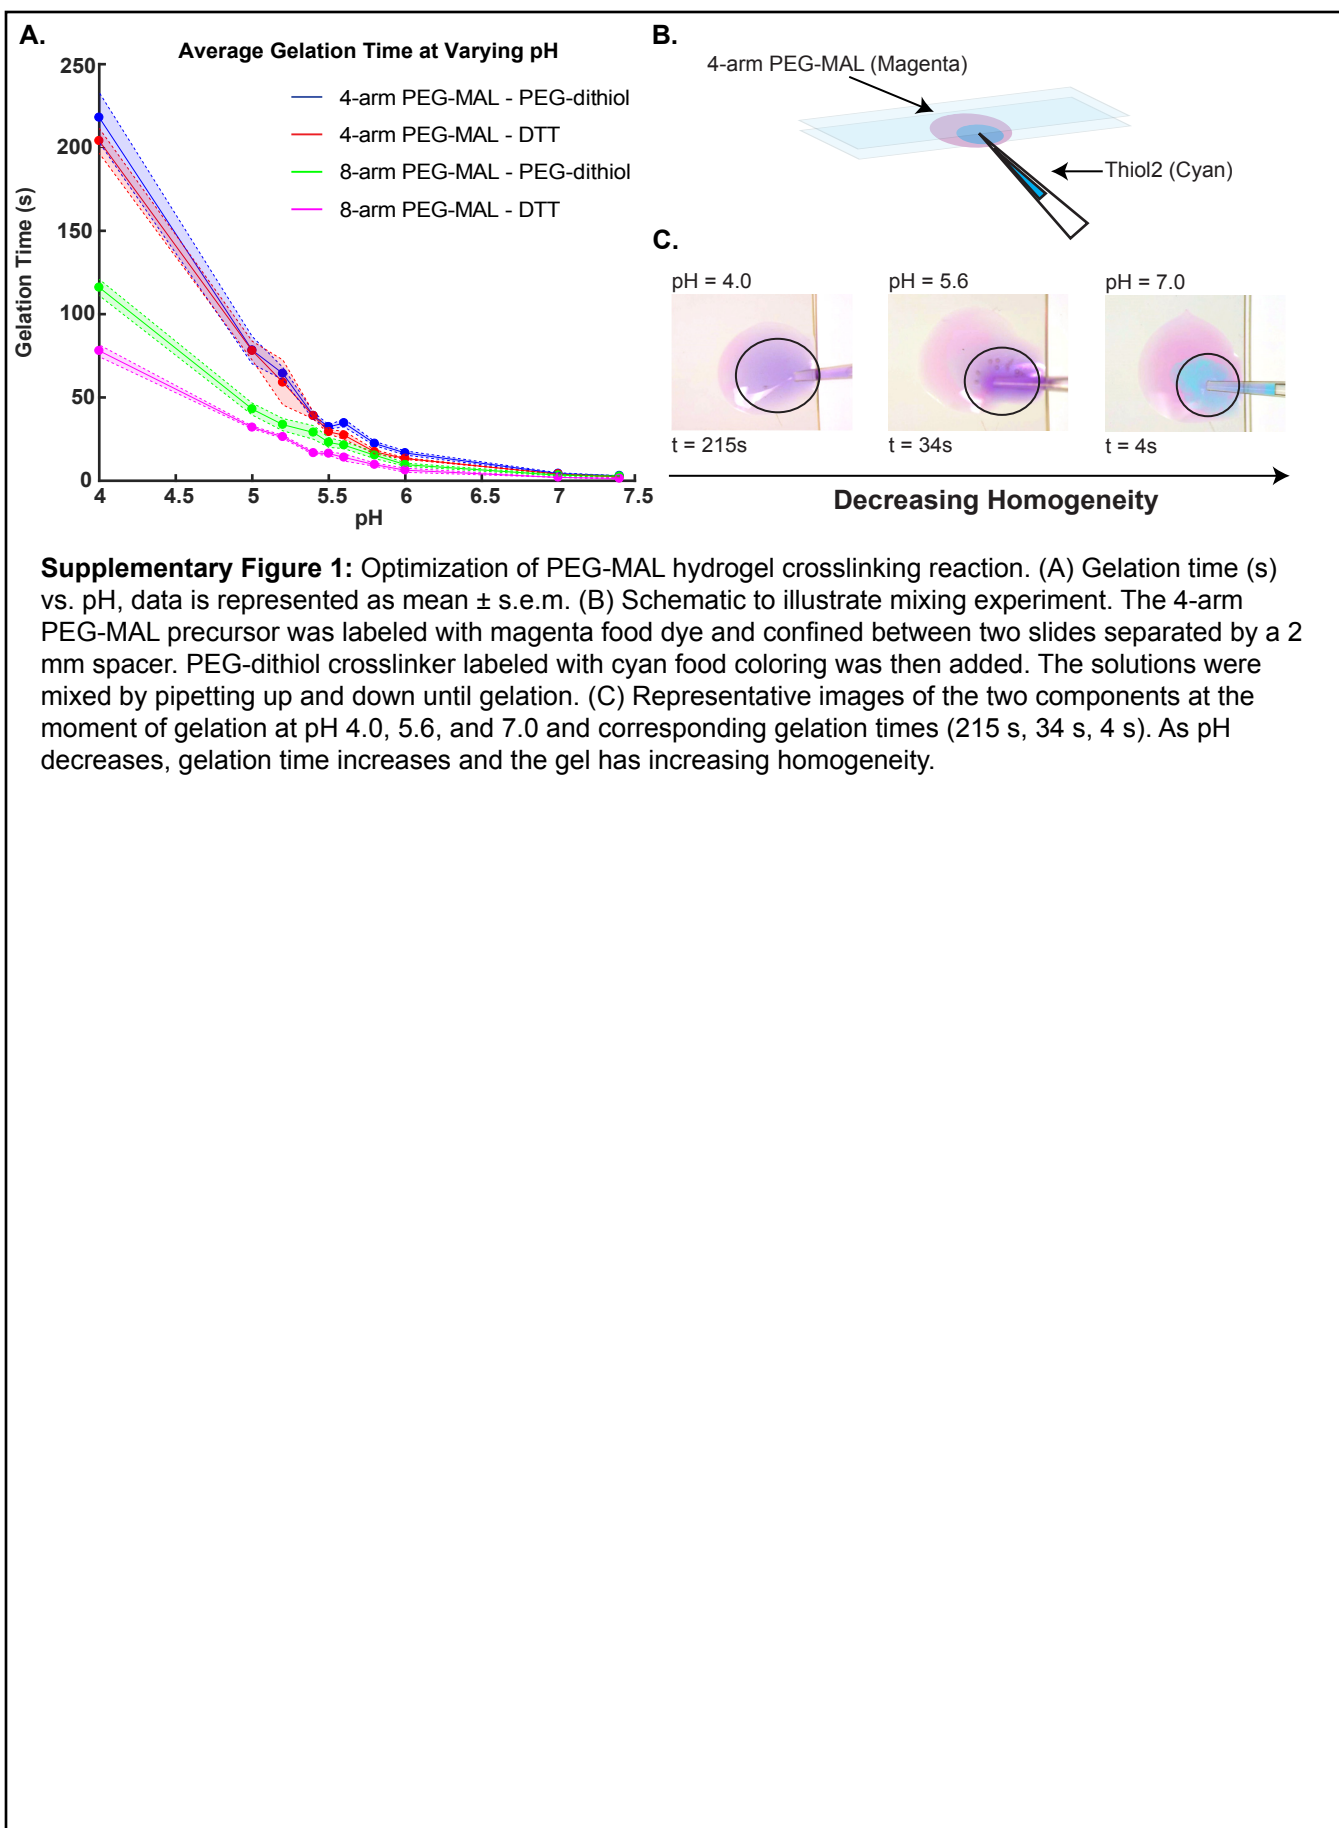

Supplement: d0bm01499k1.pdf [file d0bm01499k1.pdf]
